# Supplementary material
Source: publisher figshare collection journal article supplement (https://tandf.figshare.com/ndownloader/files/17458070)
Supplement: Supplementary file 1 [file 17458070]

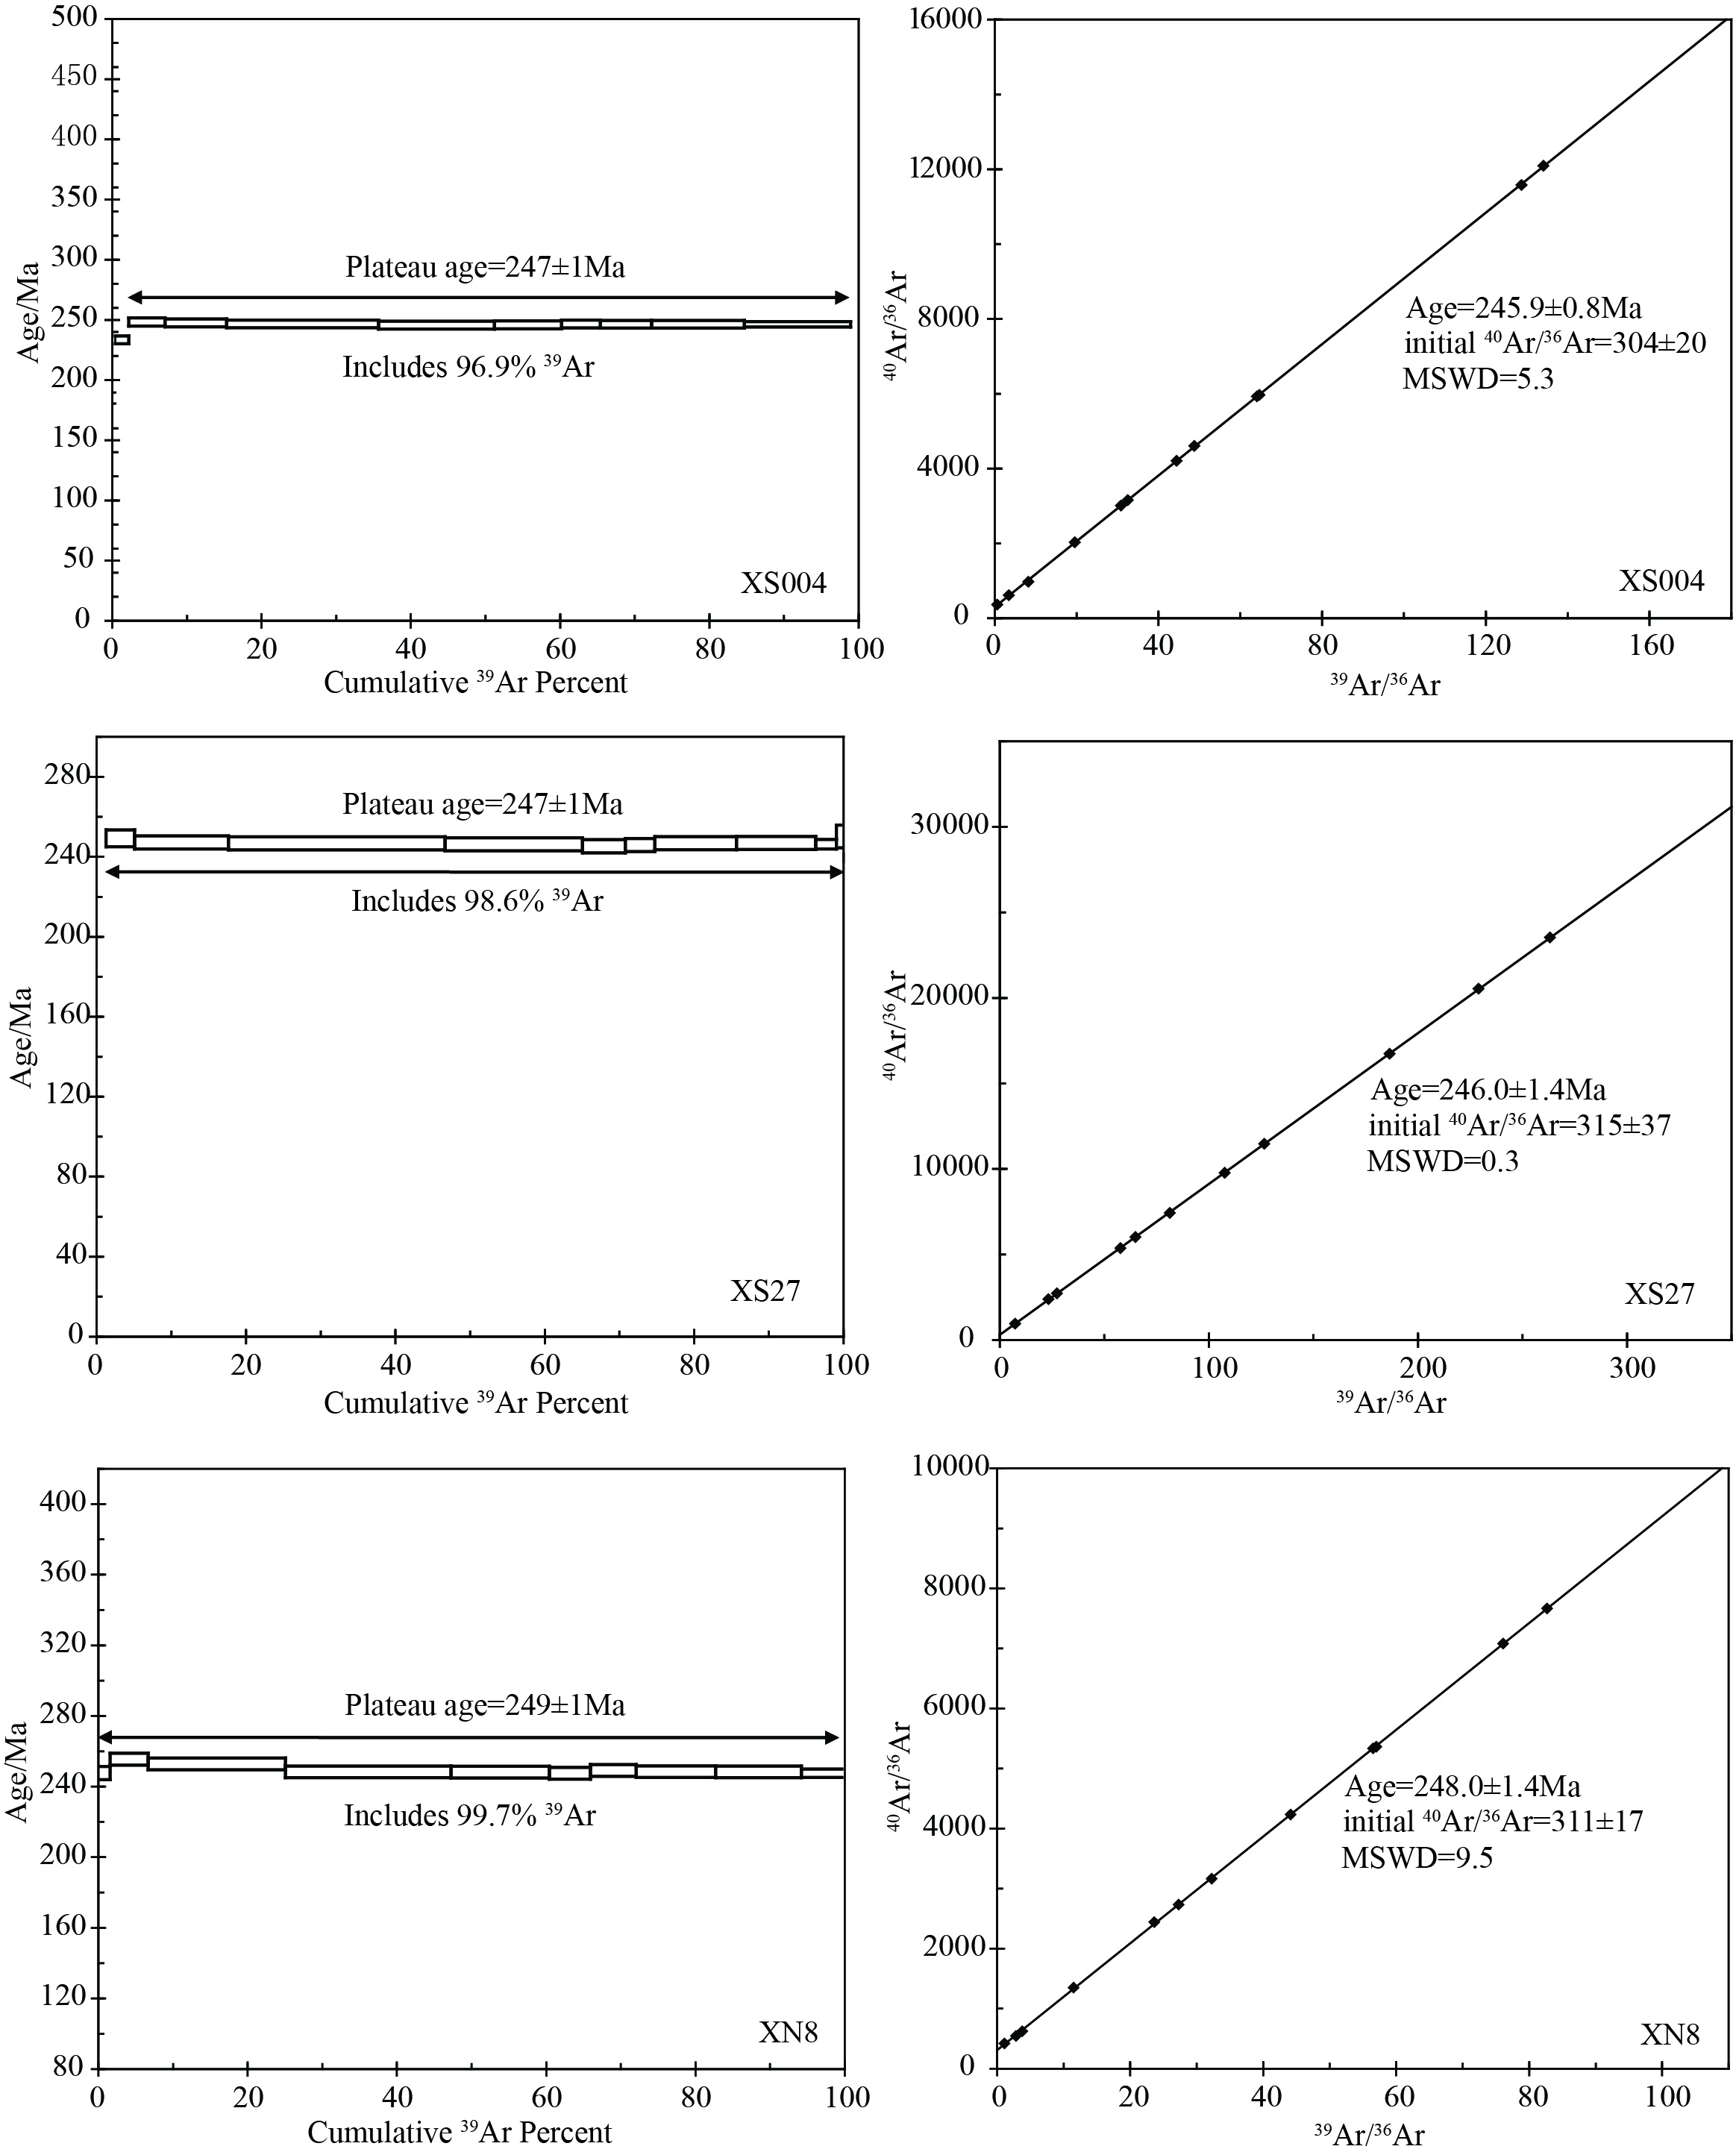


**Supplementary figure 1.** Muscovite 40Ar/39Ar spectra and isochron plots of meta-sedimentary rocks from the Wuguan Complex.
